# Supplementary material
Source: PubMed Central journal article supplement (PMC2082211)
Supplement: NIHMS21926-supplement-01.pdf [file NIHMS21926-supplement-01.pdf]

**Supplementary Table S1.**

Comparison of pseudo-rotation angles of Z-RNA, Z-DNA (bound by Z $\alpha$ ) and Z-RNA in high salt.

| Table S1. Comparison of sugar pucker parameters of Z-RNA and Z-DNA |                          |           |                          |           |                                     |           |
|--------------------------------------------------------------------|--------------------------|-----------|--------------------------|-----------|-------------------------------------|-----------|
| Strand I                                                           | Z-RNA<br>(this work)     |           | Z-DNA [1] 1QBJ           |           | High Salt Z-RNA<br>[2] 1T4X model 1 |           |
|                                                                    | Pseudo-rotation<br>angle | Puckering | Pseudo-rotation<br>angle | Puckering | Pseudo-rotation<br>angle            | Puckering |
| 1 C                                                                | 147.2                    | C2'-endo  | 160.8                    | C2'-endo  | 200.1                               | C3'-exo   |
| 2 G                                                                | 28.7                     | C3'-endo  | 25.8                     | C3'-endo  | 50.8                                | C4'-exo   |
| 3 C                                                                | 162.2                    | C2'-endo  | 160.4                    | C2'-endo  | 138.0                               | C1'-exo   |
| 4 G                                                                | 17.2                     | C3'-endo  | 20.9                     | C3'-endo  | 44.0                                | C4'-exo   |
| 5 C                                                                | 155.1                    | C2'-endo  | 157.3                    | C2'-endo  | 160.8                               | C2'-endo  |
| 6 G                                                                | 19.6                     | C3'-endo  | 164.1                    | C2'-endo  | 23.5                                | C3'-endo  |
| Strand II                                                          |                          |           |                          |           |                                     |           |
| 1 G                                                                | 177.9                    | C2'-endo  | 170.4                    | C2'-endo  | 27.1                                | C3'-endo  |
| 2 C                                                                | 157.4                    | C2'-endo  | 159.0                    | C2'-endo  | 163.9                               | C2'-endo  |
| 3 G                                                                | 25.8                     | C3'-endo  | 27.0                     | C3'-endo  | 47.5                                | C4'-exo   |
| 4 C                                                                | 161.0                    | C2'-endo  | 159.2                    | C2'-endo  | 131.2                               | C1'-exo   |
| 5 G                                                                | 36.6                     | C3'-endo  | 25.5                     | C3'-endo  | 46.8                                | C4'-exo   |
| 6 C                                                                | 157.2                    | C2'-endo  | 154.3                    | C2'-endo  | 197.9                               | C3'-exo   |

## References

1. Schwartz, T., Rould, M.A., Lowenhaupt, K., Herbert, A., and Rich, A. (1999). Crystal structure of the Zalpha domain of the human editing enzyme ADAR1 bound to left-handed Z-DNA. *Science* 284, 1841-1845.
2. Popena, M., Milecki, J., and Adamiak, R.W. (2004). High salt solution structure of a left-handed RNA double helix. *Nucleic Acids Res* 32, 4044-4054.

**Supplementary Table S2.**

Detailed parameters defining sugar conformation in the Z $\alpha$ /RNA complex.

Source 3DNA[1]

Note:

|                                  |                               |
|----------------------------------|-------------------------------|
| v0: C4'-O4'-C1'-C2'              | alpha: O3'(i-1)-P-O5'-C5'     |
| v1: O4'-C1'-C2'-C3'              | beta: P-O5'-C5'-C4'           |
| v2: C1'-C2'-C3'-C4'              | gamma: O5'-C5'-C4'-C3'        |
| v3: C2'-C3'-C4'-O4'              | delta: C5'-C4'-C3'-O3'        |
| v4: C3'-C4'-O4'-C1'              | epsilon: C4'-C3'-O3'-P(i+1)   |
|                                  | zeta: C3'-O3'-P(i+1)-O5'(i+1) |
| tm: amplitude of                 | chi for pyrimidines(Y):       |
| pseudorotation of the sugar ring | O4'-C1'-N1-C2                 |
| P: phase angle of                | chi for purines(R):           |
| pseudorotation of the sugar ring | O4'-C1'-N9-C4                 |

## Strand I

| base | v0    | v1    | v2    | v3    | v4   | tm   | P     | Puckering |
|------|-------|-------|-------|-------|------|------|-------|-----------|
| 1 C  | -30.6 | 38.6  | -32.1 | 15.2  | 9.6  | 38.2 | 147.2 | C2'-endo  |
| 2 G  | -5.9  | -15.4 | 29.2  | -33.5 | 25.1 | 33.3 | 28.7  | C3'-endo  |
| 3 C  | -26.6 | 41.9  | -41.8 | 26.9  | -0.3 | 43.9 | 162.2 | C2'-endo  |
| 4 G  | 0.6   | -15.8 | 23.9  | -24.1 | 14.9 | 25.0 | 17.2  | C3'-endo  |
| 5 C  | -28.1 | 40.0  | -36.2 | 20.8  | 4.5  | 39.9 | 155.1 | C2'-endo  |
| 6 G  | -0.4  | -11.5 | 18.3  | -18.9 | 12.3 | 19.4 | 19.6  | C3'-endo  |

## Strand II

| base | v0    | v1    | v2    | v3    | v4    | tm   | P     | Puckering |
|------|-------|-------|-------|-------|-------|------|-------|-----------|
| 1 G  | -16.1 | 37.8  | -43.8 | 36.3  | -12.6 | 43.8 | 177.9 | C2'-endo  |
| 2 C  | -31.5 | 46.3  | -43.0 | 26.1  | 3.4   | 46.6 | 157.4 | C2'-endo  |
| 3 G  | -3.6  | -14.4 | 25.6  | -28.4 | 20.4  | 28.4 | 25.8  | C3'-endo  |
| 4 C  | -27.4 | 42.8  | -41.2 | 26.7  | 0.2   | 43.6 | 161.0 | C2'-endo  |
| 5 G  | -10.7 | -11.2 | 26.9  | -33.8 | 28.3  | 33.6 | 36.6  | C4'-exo   |
| 6 C  | -28.2 | 41.5  | -38.1 | 23.3  | 2.8   | 41.3 | 157.2 | C2'-endo  |

## Strand I

| base | alpha  | beta   | gamma  | delta | epsilon | zeta  | chi    |
|------|--------|--------|--------|-------|---------|-------|--------|
| 1 C  | ---    | 148.5  | 47.6   | 137.0 | -100.0  | 74.9  | -136.8 |
| 2 G  | 70.3   | -167.9 | 169.4  | 86.9  | -110.0  | -70.9 | 59.4   |
| 3 C  | -146.7 | -125.0 | 53.8   | 147.9 | -98.9   | 77.8  | -142.1 |
| 4 G  | 63.4   | -170.0 | -179.3 | 99.9  | -125.7  | -47.3 | 61.4   |
| 5 C  | -164.9 | -133.9 | 59.9   | 143.3 | -102.2  | 79.2  | -145.7 |
| 6 G  | 58.2   | -174.1 | -174.9 | 97.1  | ---     | ---   | 65.9   |

## Strand II

| base | alpha  | beta   | gamma  | delta | epsilon | zeta  | chi    |
|------|--------|--------|--------|-------|---------|-------|--------|
| 1 G  | 93.8   | 179.0  | -172.3 | 159.1 | ---     | ---   | 77.6   |
| 2 C  | -158.7 | -130.3 | 69.2   | 145.7 | -94.6   | 49.7  | -149.3 |
| 3 G  | 56.0   | -164.6 | -178.5 | 92.0  | -115.0  | -66.9 | 59.3   |
| 4 C  | -149.2 | -125.7 | 56.2   | 148.3 | -97.7   | 79.2  | -141.0 |
| 5 G  | 72.8   | -170.9 | 171.3  | 86.4  | -110.1  | -70.9 | 56.0   |
| 6 C  | ---    | -171.8 | 61.1   | 144.0 | -91.6   | 72.3  | -138.1 |

## References

1. Lu, X.J., and Olson, W.K. (2003). 3DNA: a software package for the analysis, rebuilding and visualization of three-dimensional nucleic acid structures. *Nucleic Acids Res* 31, 5108-5121.
